# Supplementary material
Source: bioRxiv or medRxiv preprint supplement (https://www.biorxiv.org/highwire/filestream/3441/field_highwire_adjunct_files/10/013631-4.pdf)

A.

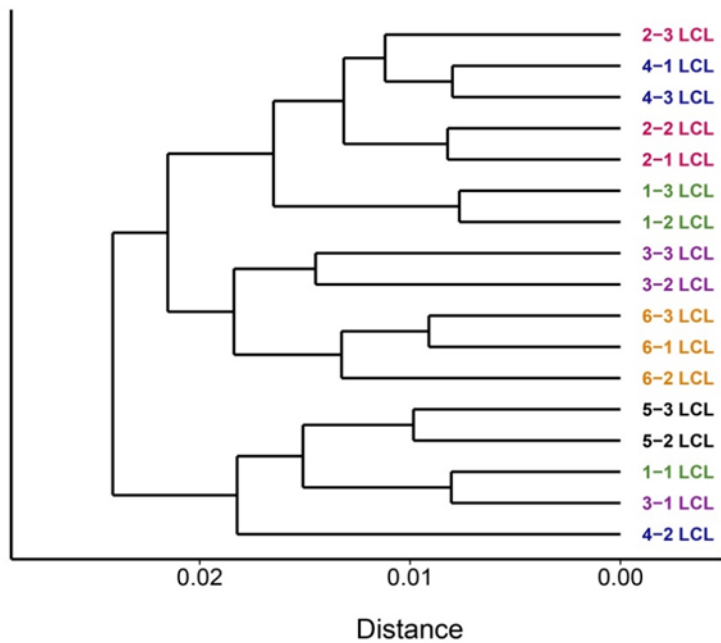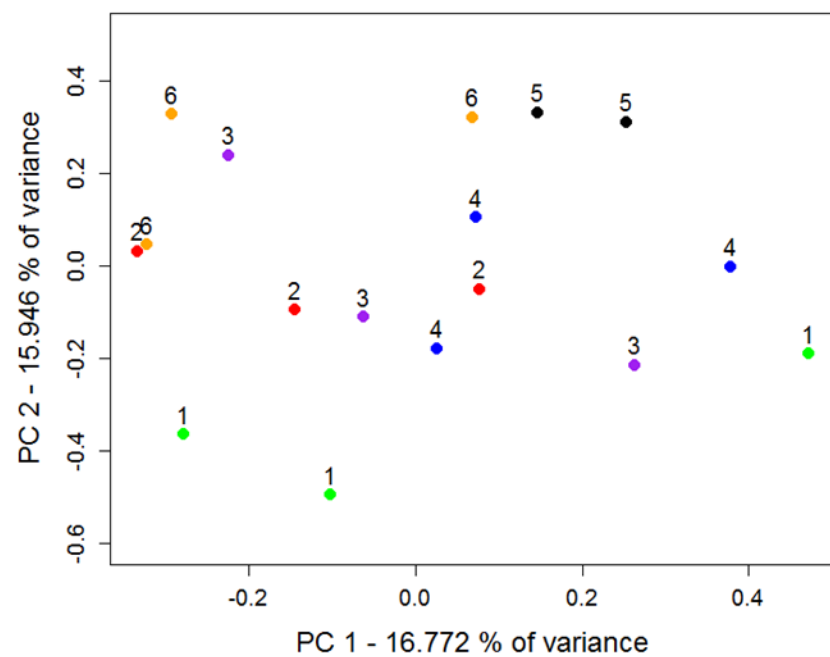

B.

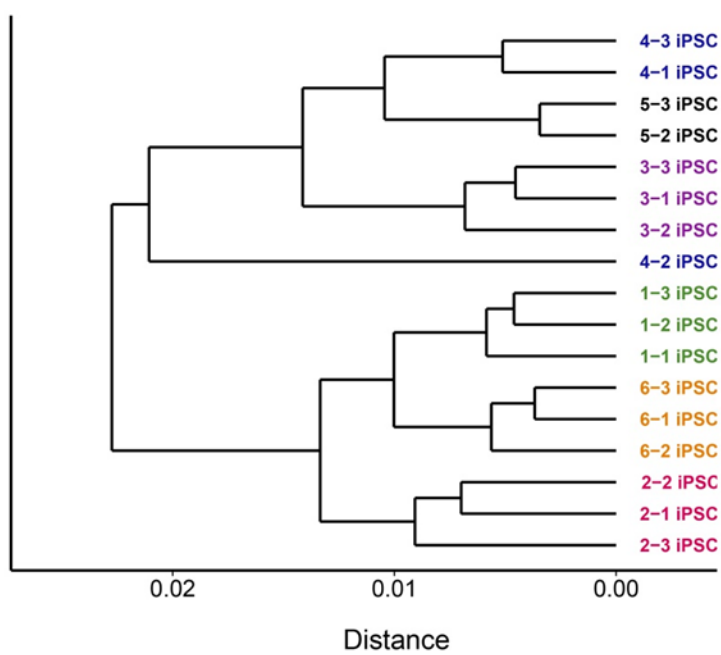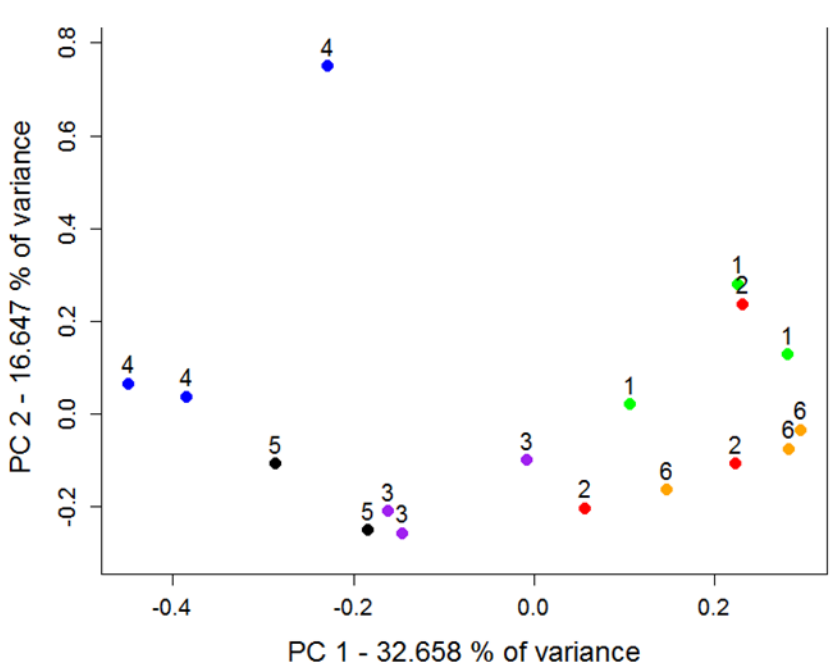

Supplement: Supplementary file [file 013631-4.pdf]
